# Supplementary material for: Fluorine-Functionalized Polyphosphazene Immunoadjuvant: Synthesis, Solution Behavior and In Vivo Potency
Source: MDPI journal article supplement (doi:10.3390/molecules28104218), 2023-05-21
Supplement: s1 [file s1]

## Supplementary Materials

# Fluorine-Functionalized Polyphosphazene Immunoconjugate: Synthesis, Solution Behavior and *In Vivo* Potency

Harichandra D. Tagad <sup>1</sup>, Alexander Marin <sup>1</sup>, Ruixue Wang <sup>1</sup>, Abdul S. Yunus <sup>1</sup>, Thomas R. Fuerst <sup>1,2</sup> and Alexander K Andrianov <sup>1,\*</sup>

<sup>1</sup> Institute for Bioscience and Biotechnology Research, University of Maryland Rockville, MD 20850, USA

<sup>2</sup> Department of Cell Biology and Molecular Genetics, University of Maryland, College Park, MD 20742, USA

\* Correspondence: aandrianov@umd.edu

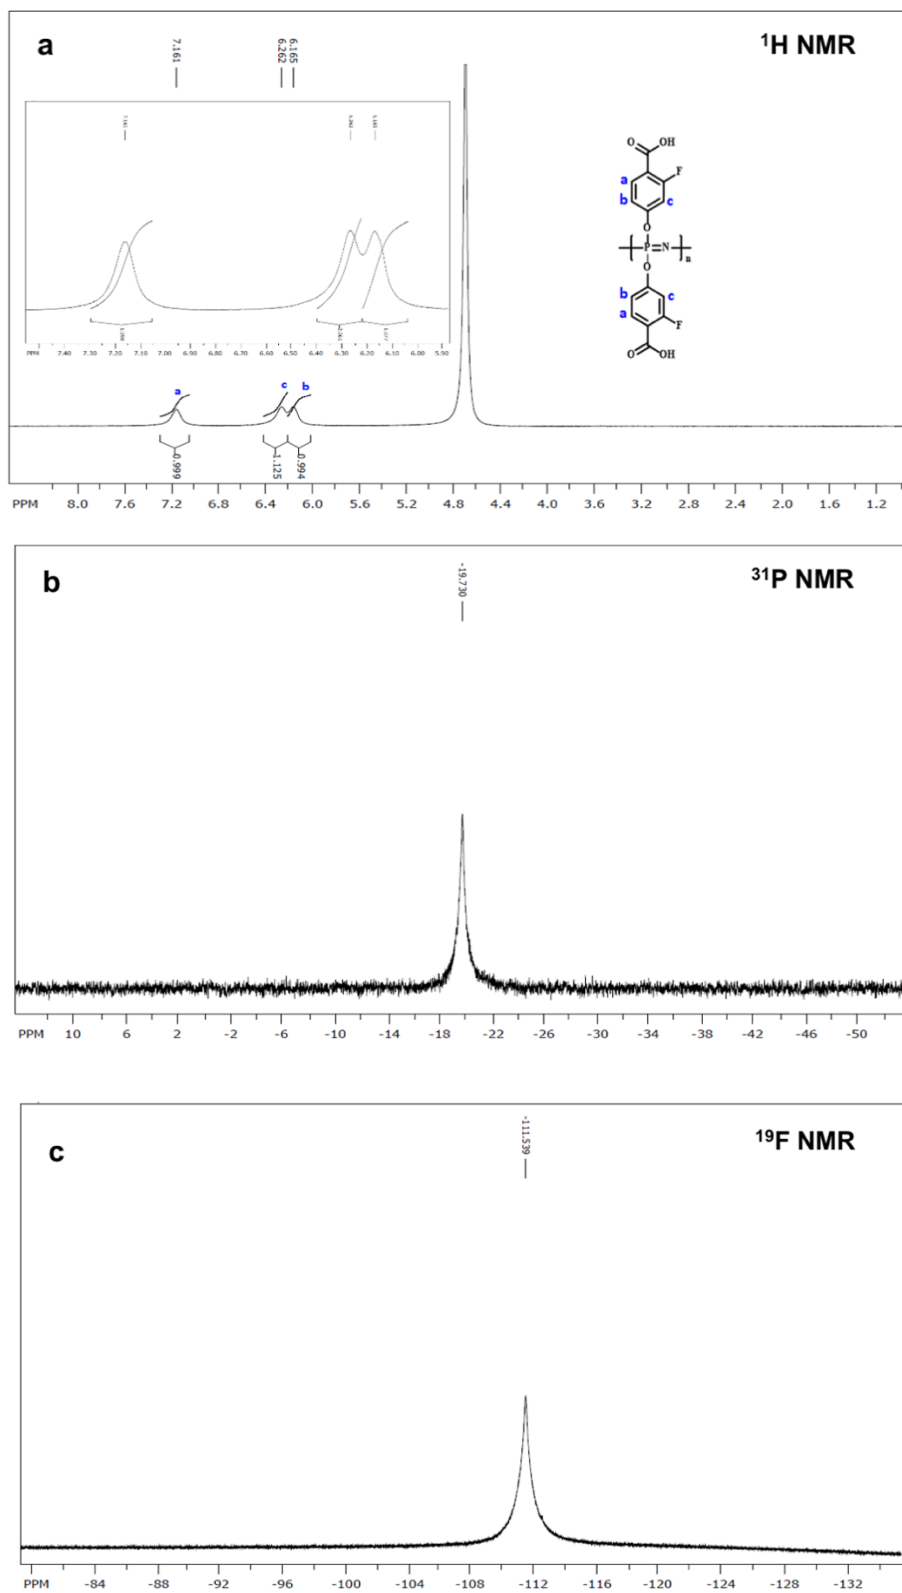

Figure S1. (a) <sup>1</sup>H, (b) <sup>31</sup>P and (c) <sup>19</sup>F NMR spectra of PCPP-F (D<sub>2</sub>O).

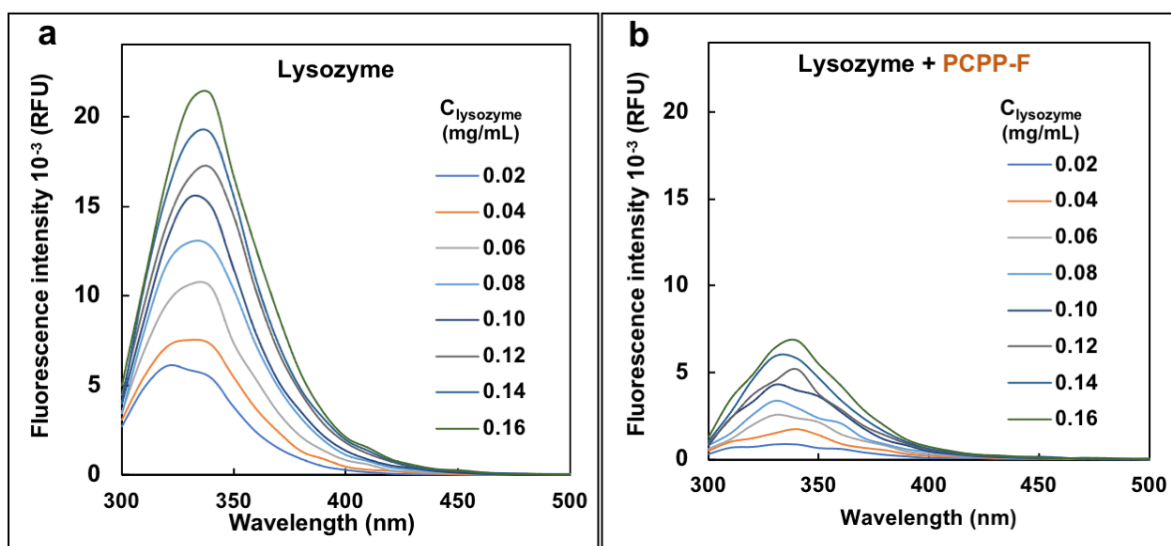

**Figure S2.** Fluorescence spectra of (a) lysozyme and (b) lysozyme - PCPP-F formulations in aqueous solutions at various concentration of protein showing fluorescence quenching effect of PCPP-F (0.05 mg/mL PCPP-F; phosphate buffer, pH 7.4;  $\lambda_{\text{ex}}$  - 300 nm).

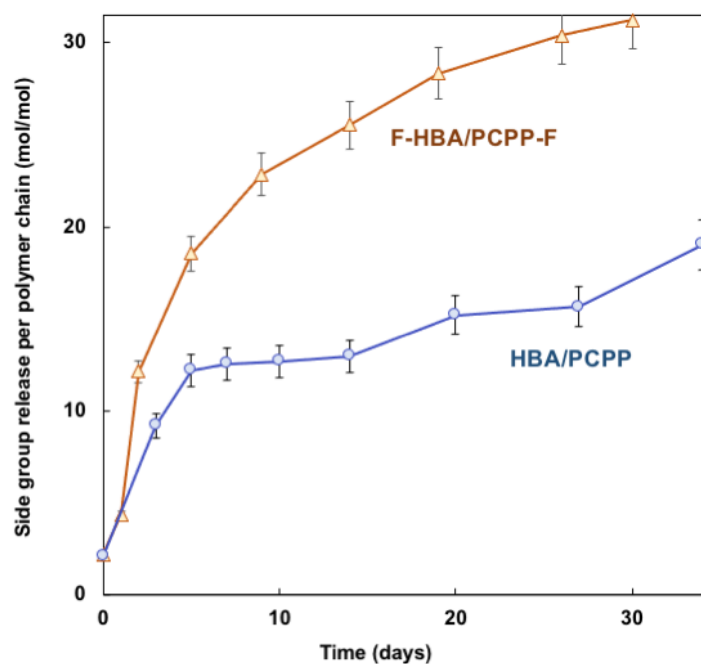

**Figure S3.** Release of low molecular weight products containing polymer side groups as detected by SEC: hydroxybenzoic acid (HBA) of PCPP and fluorinated hydroxybenzoic acid (F-HBA) of PCPP-F (0.25 mg/mL polymer; 80°C; PBS, pH 7.4).
